# Supplementary material for: Piquing Curiosity: Déjà vu-Like States Are Associated with Feelings of Curiosity and Information-Seeking Behaviors
Source: J Intell. 2023 Jun 5;11(6):112. doi: 10.3390/jintelligence11060112 (PMC10299614; doi:10.3390/jintelligence11060112)
Supplement: Supplementary file 1 [file jintelligence-11-00112-s001.zip]

Archive with 4 entries (4 files):
- SupplementaryS1_Experiment1Instructions.pdf
- SupplementaryS2_Experiment2Instructions.pdf
- SupplementaryS3_Experiment1_LimOppsConditionalized.pdf
- SupplementaryS4_Experiment2_IDStatusConditionalizedAnalyses.pdf
